# Supplementary material for: Hydroponic Fertilizers as a Growth Media for Chlorella vulgaris for Producing Affordable Protein in Developing Countries
Source: Research Square preprint supplement (doi:10.21203/rs.3.rs-4198065/v1), 2024-04-11
Supplement: Supplementary file 1 [file 936023e9051b90e142113b4b.docx]

Supplement Materials

**Supplement 1. Calibration curve for AD and dry biomass weight**


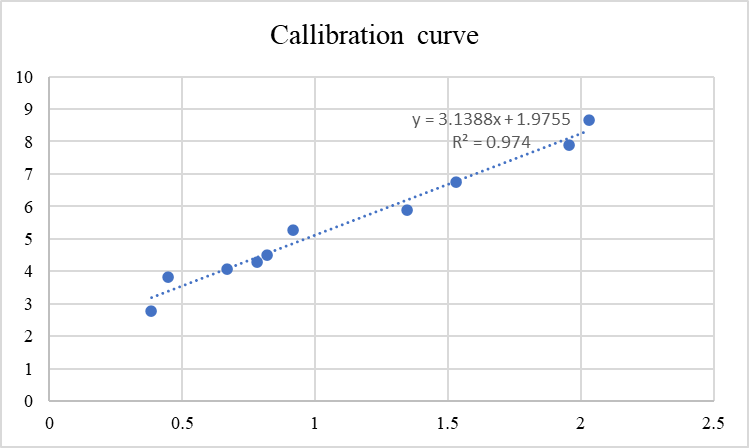
**Supplement 2. Two-way ANOVA analysis and Tukey’s post hoc test for growth rate**

| **A1. Overall ANOVA for Growth Rate** | | | | | |
| --- | --- | --- | --- | --- | --- |
|  | **DF** | **Sum of Squares** | **Mean Square** | **F Value** | **P Value** |
| **Ratio** | 3 | 0.0534 | 0.0178 | 11.3318 | 2.09E-04 |
| **Concentration** | 2 | 0.0067 | 0.0033 | 2.1309 | 0.1477 |
| **Interaction** | 6 | 0.0179 | 0.003 | 1.8928 | 0.1374 |
| **Model** | 11 | 0.0994 | 0.009 | 5.7511 | 5.77E-04 |
| **Error** | 18 | 0.0283 | 0.0016 | -- | -- |
| **Corrected Total** | 29 | 0.1277 | -- | -- | -- |
|  |  |  |  |  |  |
| **B1. Tukey test for ratio** | | | | | |
|  | **MeanDiff** | **SEM** | **q Value** | **Prob** | **Sig** |
| **Ratio B Ratio A** | 0.1063 | 0.0187 | 8.043 | 0.000116 | 1 |
| **Ratio C Ratio A** | 0.0439 | 0.0187 | 3.3253 | 0.1233 | 0 |
| **Ratio C Ratio B** | -0.0623 | 0.0187 | 4.7177 | 0.0176 | 1 |
| **BBM Ratio A** | 0.0567 | 0.0264 | 3.0321 | 0.1771 | 0 |
| **BBM Ratio B** | -0.0496 | 0.0264 | 2.6552 | 0.272 | 0 |
| **BBM Ratio C** | 0.0127 | 0.0264 | 0.6807 | 0.9623 | 0 |
|  |  |  |  |  |  |
| **C1. Tukey test for concentration** | | | | | |
|  | **MeanDiff** | **SEM** | **q Value** | **Prob** | **Sig** |
| **Conc. 2 Conc. 1** | -0.0075 | 0.0175 | 0.6074 | 0.9039 | 0 |
| **Conc. 3 Conc. 1** | -0.0707 | 0.0175 | 5.7218 | 0.0021 | 1 |
| **Conc. 3 Conc. 2** | -0.0632 | 0.0187 | 4.7841 | 0.0088 | 1 |

**Supplement 3. Two-way ANOVA analysis and Tukey’s post hoc test for Biomass yield**

| **A2. Overall ANOVA for Biomass Yiels** | | | | | |
| --- | --- | --- | --- | --- | --- |
|  | **DF** | **Sum of Squares** | **Mean Square** | **F Value** | **P Value** |
| **Ratio** | 3 | 1.27793 | 0.42598 | 2.11187 | 0.1344 |
| **Concentration** | 2 | 0.60887 | 0.30443 | 1.5093 | 0.24775 |
| **Interaction** | 6 | 1.81898 | 0.30316 | 1.50299 | 0.23316 |
| **Model** | 11 | 61.73903 | 5.61264 | 27.8258 | 4.855E-9 |
| **Error** | 18 | 3.63071 | 0.20171 | -- | -- |
| **Corrected Total** | 29 | 65.36974 | -- | -- | -- |
|  |  |  |  |  |  |
| **B2. Tukey test for ratio** | | | | | |
|  | **MeanDiff** | **SEM** | **q Value** | **Prob** | **Sig** |
| **Ratio B Ratio A** | 0.21536 | 0.21172 | 1.43856 | 0.74168 | 0 |
| **Ratio C Ratio A** | -0.21437 | 0.21172 | 1.43192 | 0.74432 | 0 |
| **Ratio C Ratio B** | -0.42973 | 0.21172 | 2.87047 | 0.21409 | 0 |
| **BBM Ratio A** | -0.52859 | 0.29941 | 2.49672 | 0.32118 | 0 |
| **BBM Ratio B** | -0.74396 | 0.29941 | 3.51393 | 0.09657 | 0 |
| **BBM Ratio C** | -0.31423 | 0.29941 | 1.4842 | 0.72334 | 0 |
|  |  |  |  |  |  |
| **C2. Tukey test for concentration** | | | | | |
|  | **MeanDiff** | **SEM** | **q Value** | **Prob** | **Sig** |
| **Conc. 2 Conc. 1** | 0.76514 | 0.19804 | 5.46386 | 0.00311 | 1 |
| **Conc. 3 Conc. 1** | 3.25421 | 0.19804 | 23.23821 | 0 | 1 |
| **Conc. 3 Conc. 2** | 2.48906 | 0.21172 | 16.62638 | 0 | 1 |

**Supplement 4. Analysis of microalgae cultivation cost**

| **Parameters** | **BBM** | **A** | | | **B** | | | **C** | | |
| --- | --- | --- | --- | --- | --- | --- | --- | --- | --- | --- |
| **1** | **2** | **3** | **1** | **2** | **3** | **1** | **2** | **3** |
| **Biomass** | | | | | | | | | | |
| Biomass productivity (g DW.L-1.day-1) | 0.42 | 0.47 | 0.42 | 0.31 | 0.44 | 0.49 | 0.36 | 0.48 | 0.42 | 0.33 |
| Biomass density at peak (g DW. L-1) | 6.71 | 5.65 | 7.07 | 9.00 | 5.78 | 6.83 | 9.75 | 5.77 | 6.34 | 8.96 |
| Mass of biomass in 10 PBR (1 liter WV) | 67.11 | 56.54 | 70.68 | 89.95 | 57.85 | 68.33 | 97.45 | 57.73 | 63.36 | 89.65 |
| Number of PBR required to produce 1 kg DW of Biomass | 14.90 | 17.69 | 14.15 | 11.12 | 17.29 | 14.63 | 10.26 | 17.32 | 15.78 | 11.16 |
| **Cultivation Cost** | | | | | | | | | | |
| Cost of Medium |  |  |  |  |  |  |  |  |  |  |
| 1 litre of water (IDR) | 10 | 10 | 10 | 10 | 10 | 10 | 10 | 10 | 10 | 10 |
| Nutrient/fertilizer cost for 1 litre of medium | 495 | 127.5 | 191.25 | 255 | 159.375 | 239.0625 | 318.75 | 159.375 | 239.0625 | 318.75 |
| Total medium cost (IDR) | 75255 | 24318 | 28474 | 29460 | 29279 | 36447 | 33735 | 29337 | 39307 | 36672 |
| Total medium cost (EUR) | 4.39 | 1.42 | 1.66 | 1.72 | 1.71 | 2.13 | 1.97 | 1.71 | 2.29 | 2.14 |
| **Energy** | | | | | | | | | | |
| Time to reach the peak density (day) | 16 | 12 | 17 | 29 | 13 | 14 | 27 | 12 | 15 | 27 |
| 5 watts of light (kwh/day) | 0.12 | 0.12 | 0.12 | 0.12 | 0.12 | 0.12 | 0.12 | 0.12 | 0.12 | 0.12 |
| Total energy for light (kwh) | 28.61 | 25.47 | 28.86 | 38.69 | 26.97 | 24.58 | 33.25 | 24.94 | 28.41 | 36.14 |
| 3 watt of aeration pump (kwh/day) | 0.07 | 0.07 | 0.07 | 0.07 | 0.07 | 0.07 | 0.07 | 0.07 | 0.07 | 0.07 |
| Total energy for pump | 17.17 | 15.28 | 17.32 | 23.21 | 16.18 | 14.75 | 19.95 | 14.97 | 17.04 | 21.69 |
| Total required energy (kwh) | 45.78 | 40.75 | 46.18 | 61.90 | 43.15 | 39.34 | 53.20 | 39.91 | 45.45 | 57.83 |
| Cost for energy (IDR) | 66136 | 58870 | 66717 | 89425 | 62334 | 56828 | 76852 | 57653 | 65665 | 83544 |
| Cost for energy (EUR) | 3.86 | 3.43 | 3.89 | 5.21 | 3.63 | 3.31 | 4.48 | 3.36 | 3.83 | 4.87 |
| Total cost (IDR) | 235645 | 86725 | 99435 | 123332 | 95934 | 98763 | 115718 | 91320 | 110890 | 125793 |
| **Total cost (USD)** | 8.24 | 4.85 | 5.55 | 6.93 | 5.34 | 5.44 | 6.45 | 5.07 | 6.12 | 7.01 |
